# Supplementary material for: CuAAC–methacrylate interpenetrating polymer network (IPN) properties modulated by visible-light photoinitiation
Source: Royal Society of Chemistry journal article supplement (doi:10.1039/d3py00507k), 2023-01-01
Supplement: d3py00507k1.pdf [file d3py00507k1.pdf]

Supporting Information for

**CuAAC-methacrylate interpenetrating polymer network (IPN) properties modulated by visible-light photoinitiation**

Mukund Kabra, Dr. Christopher J. Kloxin

|                                                                                            |   |
|--------------------------------------------------------------------------------------------|---|
| FIGURE S1.1 <sup>1</sup> H NMR FOR PEG DIAZIDE (464.52 G/MOL) IN CDCL <sub>3</sub>         | 2 |
| FIGURE S1.2 <sup>1</sup> H NMR FOR ALIPHATIC TRIALKYNE (248.32 G/MOL) IN CDCL <sub>3</sub> | 3 |
| FIGURE S1.3 NEAR IR SPECTRUM OF IPN 50-50 BEFORE AND AFTER IRRADIATION                     | 4 |

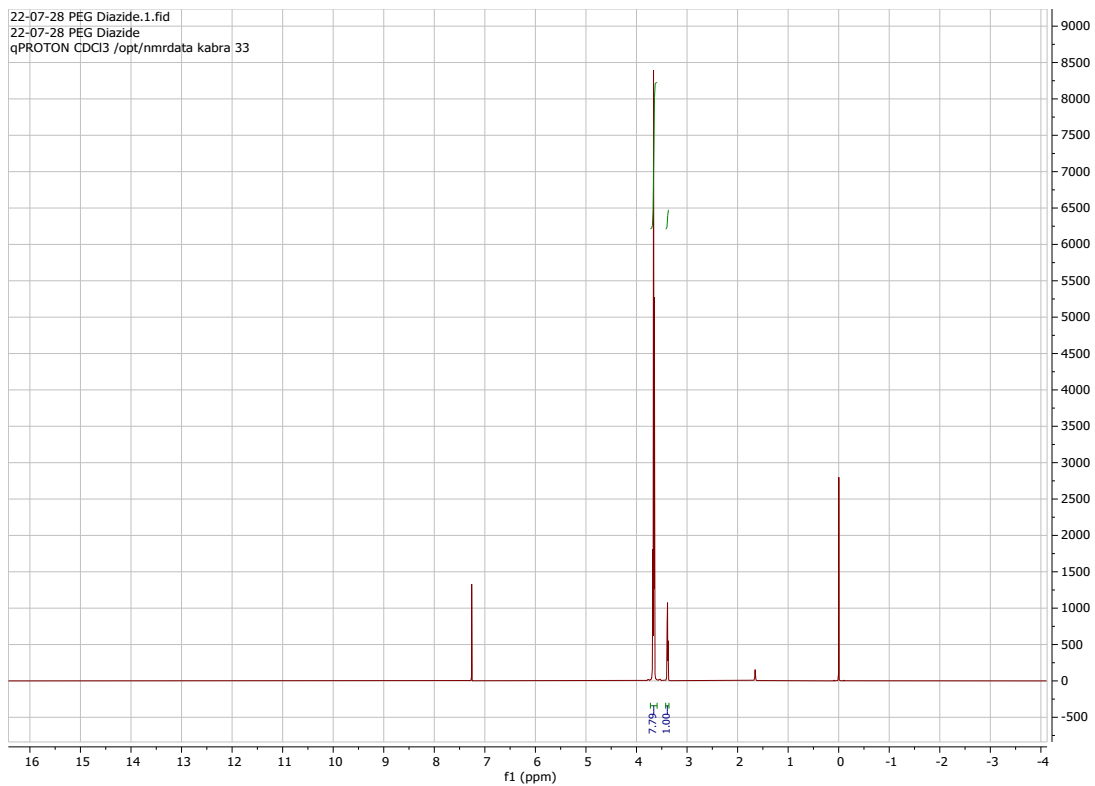

Figure S1.1  $^1\text{H}$  NMR for PEG Diazide (464.52 g/mol) in  $\text{CDCl}_3$

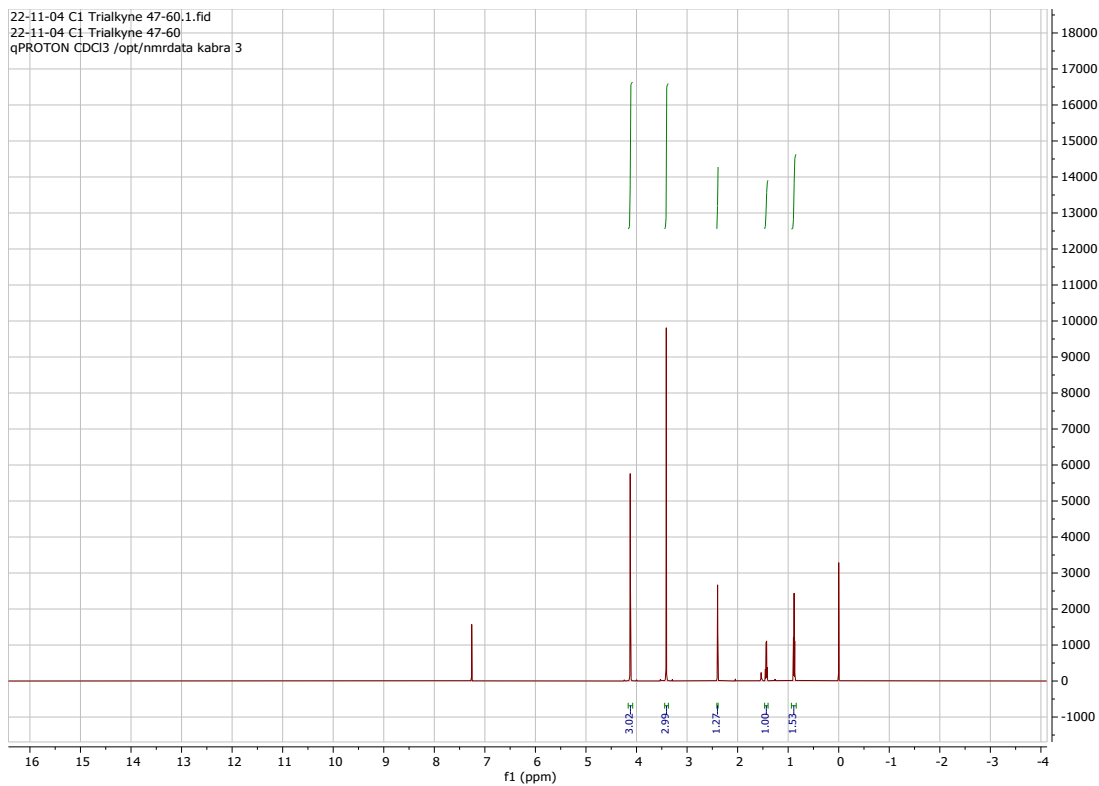

Figure SI.2  $^1\text{H}$  NMR for Aliphatic Trialkyne (248.32 g/mol) in  $\text{CDCl}_3$

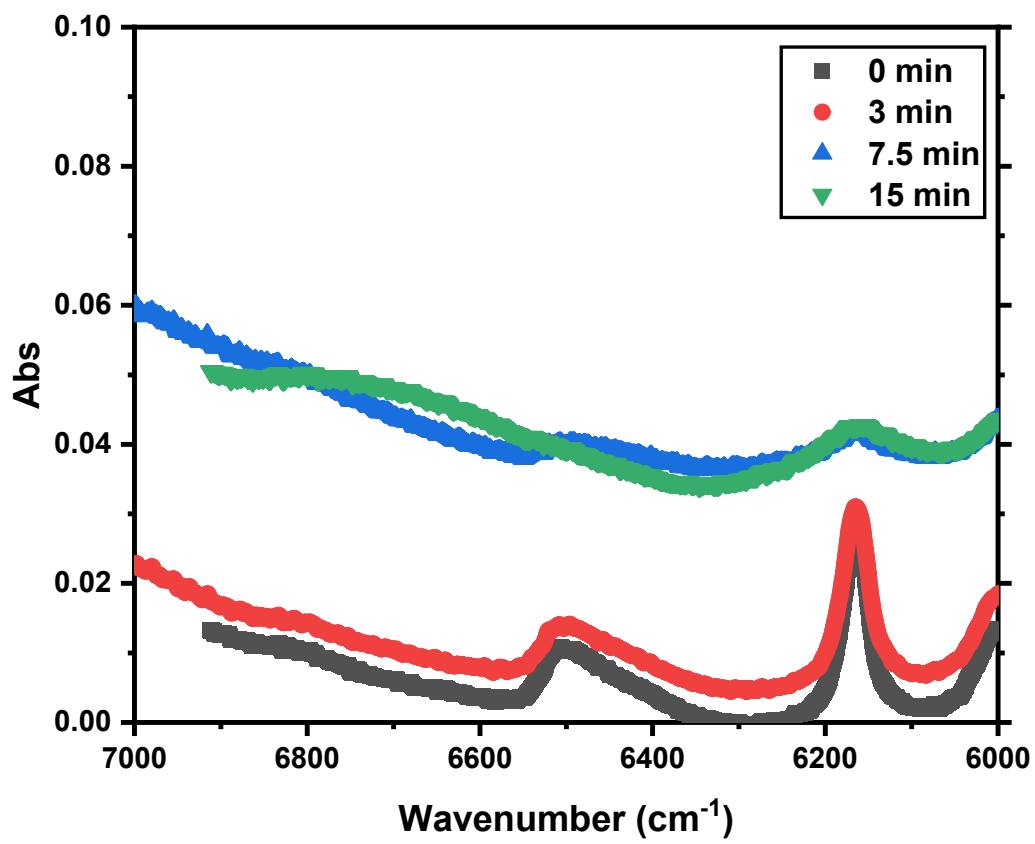

Figure SI.3 Near IR Spectrum of IPN 50-50 before and after irradiation
